# Supplementary material for: Experiences and perceptions of participants, therapists and stakeholders about the intervention provided as part of the Early and Intensive Motor Training trial for People with SCI: A qualitative study
Source: Research Square preprint supplement (doi:10.21203/rs.3.rs-8255542/v1), 2025-12-05
Supplement: Supplementary file 1 [file 0d5c165e7691475a71ad1e83.docx]

# Supplementary File:Interview Guides for the (i) participants in the intervention group, (ii) participants in the usual care group, (iii) therapists delivering the intensive motor training (iv) therapists delivering usual care (iv) stakeholders. The key questions are bolded and the probing questions are not bolded. This is a guide only because the interviews are intentionally semi-structured. This approach is being used to provide the interviewer the freedom to follow any lines of inquiry that may be new, novel or particularly interesting, and to miss questions if the interviewee has inadvertently covered the topic in a response to a previous question or if there is insufficient time to ask all questions.

1. INTERVIEW GUIDE FOR PARTICIPANTS IN THE INTERVENTION GROUP

**Introduction question:** Can you tell me about the SCI-MT trial?

Before we start, I want to ask you a hypothetical question about the trial. If you could have chosen, which group would you have preferred to have been in and why? (Perceived value)

- Pros (Reasons)
- Cons (Reasons)

The next questions are about the therapy you received as part of usual care.

**Tell me a bit about your usual therapy. So how much time did you spend on working those very weak muscle below your level of injury? (Actively contracting those muscles).**

- Do you think more time or less time should have been spent on working these muscles? (Reasons)
- What did you think about the variety of exercises? Did you feel you had enough variety of exercises or needed more variety? (Reasons)
- What about number of therapy sessions or time spent on therapy? (Reasons)

**Now think about your usual therapy and the additional training. What differences/similarities did you notice in terms of the type of therapy and the overall structure of your therapy sessions?**

- Goal setting
- Repetitions
- Exercise types (Focusing on weak muscles below level of injury)
- Practice sheets
- Targets

Thenext few questions are about your overall experiences of the additional training you received.

**What were your overall experiences in receiving additional training?**

- What did you like about it? (Probe: goal setting, additional training, relationship with the therapist, perceived benefit)
- Was there anything about the additional training that you didn’t like? Why is that? (Probe: on top of usual rehab and burden, time to do other things e.g., spend time with family/rest; perceived harm)
- What are some key characteristics that you would like from the staff providing the additional training? (Probe: manner of communication, empathy, clinical experiences)
- In terms of time and planning for your day, when did you do the additional training (e.g., evening, weekend etc) and reasons? (Probe: convenience, planning, logistical reasons)?
- Tell me what happened after 10 weeks that was similar to the additional training you received? (Probe: extra practices on your own/in room)

**Were you aware of goals being set to help guide the additional training sessions? Can you tell me how your goals were set?**

- Did you discuss the goals with your therapists?
- If participants say no (not involved), ask “w*ould you have valued it if you were involved? Please provide reasons*.”
- What was your experience with setting SMART goals? - easy or hard? (Reasons)
- Tell me a bit more about the process, what happened once you set goals at the beginning? Did you set new ones or revisit the old ones?
- Did the goals influence what you did in training?

**Tell me a bit about how you and your therapist kept track of what you had done each day and what you would do the next day.**

- Did you have any pictures of your exercises or notes using the Practice Sheets?
- If details were recorded, what exactly were recorded and why?
- What did you think of the recording sheets and having your exercises recorded on the sheets?

**Do you think the additional training helped to improve your outcomes? In what way, and how? Can you provide an example? (Probe: motor function improvement)**

**Did you think the additional training caused you any harms? If yes, in what way, and how? Can you provide an example? (Probe: time lost, injury, stamina)**

- Worthwhile to do the additional training (if yes, please provide reasons)
- If say not worthwhile, ask what would make it worthwhile

**This additional training has been done in a research setting. Looking ahead, do you think this additional training should be continued to be provided to other patients?**

- Why or why not? What would be the key advice that you would like to give feedback to these patients before they sign up for additional training?

Finally, is there anything else you would like to share with us that we have not covered?

1. INTERVIEW GUIDE FOR PARTICIPANTS IN THE USUAL CARE GROUP

**Introduction question:** Can you tell me about the SCI-MT trial?

Before we start, I want to ask you a hypothetical question about the trial. If you could have chosen, which group would you have preferred to have been in and why?

- Pros (Reasons)
- Cons (Reasons)

**If you were in the additional training group, do you think the additional training would have provided benefits to you or caused you any harms? Please provide reasons.**

- Worthwhile to do the additional training (Reasons)
- If say not worthwhile, ask what would make it worthwhile

The next questions are about the therapy you received as part of usual care.

**Tell me a bit about your usual therapy. What was your experience with your usual therapy? What did you like about the therapy? What did you not like about it? (Probe: motivation, capability to do it, perceived benefit or harm)**

**How much time did you spend on working your very weak muscle below level of injury? (Actively contracting those muscles)**

- Do you think more time or less time should have been spent on working these muscles? (Reasons)
- What did you think about the variety of exercises? Did you feel you had enough variety of exercises or needed more variety? (Reasons)
- What about number of therapy sessions or time spent on therapy? (Reasons)

**We have focused on a certain type of intensive therapy, are there other suggestions that we could have addressed to help improve your motor function?**

Finally, is there anything else you would like to share with us that we have not covered?

1. INTERVIEW GUIDE FOR THERAPISTS DELIVERING THE INTENSIVE MOTOR TRAINING

**Introduction question:** Please tell me about your role in the trial. What were your main responsibilities?

**Please describe what a typical therapy session looked like.**

**What were your experiences with providing the intervention? (Any challenges, concerns, what pleased you/surprised you?). If any, ask why?**

- What worked well? (Reasons)
- What didn’t work well? (Reasons)
- What was done to overcome the issues mentioned?

**What were some of the key components of the intervention and can you talk a little bit about your experiences in delivering these?**

- Intensive training with high repetitions (Challenges/how addressed)
- Actively contracting muscles below level of injury (Challenges/how addressed)
- Setting SMART goals with participants (Challenges/how addressed)
- Practice sheets (Challenges/how addressed)

Can you tell me how goals were set to help guide the additional training sessions?

- Did you discuss the goals with your participants?
- What was your experience of setting SMART goals? - easy or hard? (Reasons)
- Do you think the goal setting process was valued by participants? (Reasons)

In **terms of timing and planning of the additional training sessions, when did you do the additional training (e.g., evening, weekend etc.)? Why was this the best time for you and/or participants and your team (therapists)?**

- If they did not schedule the additional training sessions themselves, ask if they were to do it what they think would make it work and not work? (Reasons)

**Tell me about what you think the potential effects of the additional training sessions are for those receiving them.**

- Any benefits?
- Any harms?

**Any suggestions for new therapists involved in delivering the additional training sessions? (Need training? Watch training videos?)**

**If this additional training is found to be effective, how do you think your workplace would go with embedding this into usual therapy? Is it possible?**

- What needs to be done for this to happen?

**If the additional training sessions are to be rolled out to all patients coming through the unit or rolled out in other units, what do you suggest for staff in these units?**

Next few questions are about the participants.

**From your experiences being involved in the trial, how do you think the participants found the additional training sessions?**

**What are participants’ attitudes towards the additional training sessions? (Accepting/appreciate/not motivated/reluctant)**

- How do participants’ attitudes influence your ability to provide the training?
- What about those in the usual care group?

**What are the attitudes of other team members to the trial (other allied healthcare professionals)? What do they think of the additional training sessions?**

Finally, is there anything else you would like to share with us that we have not covered?

1. INTERVIEW GUIDE FOR THERAPISTS DELIVERING USUAL CARE

**Introduction question:** Can you tell me about the SCI-MT trial?

Hypothetically, if you were to deliver the additional training sessions, how would you feel about delivering 12 hours of additional training per week? (In terms of time, variety of therapy).

- If challenges, how could these be overcome?

**As part of the additional training, therapists and participants set their SMART goals together. What do you think of this goal setting process as the package of additional therapy?**

- Pros (Reasons)
- Cons (Reasons)

I’ll now ask you about the usual care.

**As part of the usual care, do you think what was delivered in usual care has changed in response to the trial? (Probe: exercises involve actively contracting muscles below level of injury, receive same usual care for participants in both groups, types of exercises in usual care, time spent in usual care etc.)**

**If this additional training is found to be effective, how do you think your workplace would go with embedding this into usual therapy? Is it possible?**

- What needs to be done for this to happen?

**Tell me about what you think the potential effects of the additional training are to those receiving them.**

- Any benefits?
- Any harms?

I’ll ask you a few questions about the participants in the additional training group.

**How do you think the participants found the additional training sessions?**

**What are participants’ attitudes towards the additional training sessions? (Accepting/appreciate/not motivated/reluctant)**

- Those receiving additional training
- Those receiving usual care only

Finally, is there anything else you would like to share with us that we have not covered?

1. INTERVIEW GUIDE FOR STAKEHOLDERS – HEADS OF DEPARTMENT/ SITE PRINCIPAL INVESTIGATORS

**Introduction question:** Can you tell me about the SCI-MT trial?

How did you and your unit (staff) find providing the additional training sessions?

- Intensive training with high repetitions (Any challenges, what was done?)
- Actively contracting muscles below level of injury (Challenges/address)
- Setting SMART goals with participants (Challenges/address)
- Practice sheets

**If this additional training is found to be effective, how do you think your workplace would go with embedding this into usual therapy? Is it possible?**

- What needs to be done for this to happen?
- Unit level?
- Department level?
- Hospital level?

**Tell me about what you think the potential effects of the additional training are to those receiving them.**

- Any benefits?
- Any harms?

**What were the staff’s attitudes toward the additional training sessions? (accepting/appreciate/not motivated/reluctant).**

- What worked well?
- What did not work well? (How was this addressed?)

**What do you think participants’ attitudes were towards the additional training sessions? (Accepting/appreciate/not motivated/reluctant)**

- Those receiving additional training
- Those receiving usual care only

Finally, is there anything else you would like to share with us that we have not covered?

1. **INTERVIEW GUIDE FOR STAKEHOLDERS - CONSUMERS AND SUPPORT NETWORK** REPRESENTATIVES

**Introduction question:** Can you tell me about the SCI-MT trial? (If interviewee is not aware of the trial, need to explain)

**What do you think people with spinal cord injury will think about this trial intervention? (**Probe: concept of neuroplasticity, the level of injury and intensity)

- What about staff working in spinal injury units?
- What about staff or members in your organisation?

**Tell me about what you think the potential effects of the additional training are to those receiving them.**

- Any benefits?
- Any harms?

I’ll ask you a few questions about rolling out the additional training if it is found to be effective.

**From your understanding of this trial intervention, what needs to be changed for it to be rolled out?**

- What needs to happen to get support from people with SCI for rolling it out?
- Would your network support us in rolling it out and if so, how would your organisation/network support the roll out?

**What do you recommend when the trial intervention is rolled out? If this intervention were to be rolled out, how do you think it could or should be funded?**

- Who or what organisation do you think would consider funding this type of intervention? (Support network, government)
- What would need to happen for funding to occur? (Support network, government or your local professional association)

Finally, is there anything else you would like to share with us that we have not covered?

1. **INTERVIEW GUIDE FOR STAKEHOLDERS – REPRESENTATIVES OF PHYSIOTHERAPY ASSOCIATION/ACADEMICS**

**Introduction question:** Can you tell me about the SCI-MT trial? (If interviewee is not aware of the trial, need to explain)

**These are the key components of the trial intervention. What do you think about them and are they covered in your course curriculum?**

- Intensive training with high repetitions
- Actively contracting very weak muscles below level of injury
- Setting SMART goals
- Practice sheets

**What do you think people with spinal cord injury will think about this trial intervention?**

- What about staff working in the field of spinal cord injury?

**What do you think neurological physiotherapists from your Association will think about this type of intervention?**

I’ll ask you a few questions about rolling out the additional training if it is found to be effective.

**From your understanding of this additional training, what needs to be changed for it to be rolled out?**

- In terms of research evidence
- Would your professional association support us in rolling it out and if so, how could your professional association support the roll out?

**If this intervention were to be rolled out, how do you think it could or should be funded?**

- Who or what organisation do you think would consider funding this type of intervention? (Support network, government, professional organisations)
- What would need to happen for funding to occur? (Support network, government, professional organisations)

**Finally, is there anything else you would like to share with us that we have not covered?**

1. **INTERVIEW** GUIDE FOR STAKEHOLDERS – REPRESENTATIVES OF GOVERNMENT ORGANISATIONS/FUNDERS

**Introduction question:** Can you tell me about the SCI-MT trial? (If interviewee is not aware of the trial, need to explain)

**What do you think people with spinal cord injury will think about this trial intervention?**

- What about staff working in the field of spinal injury?

**From your understanding of this trial, do you think this additional training could be rolled out if it is found to be effective? Anything need to change to roll it out?**

- What about the cost to implement the intervention?

**If the trial shows treatment effectiveness, what would need to happen to roll it out?**

- Further research/evidence (Translational trial)
- Consumer’s preference/ patients want
- Support from therapists and managers
- Evidence on implication of staffing, equipment and organisations (Hospitals)

**Do you think the government would consider funding this type of intervention?**

- What would need to happen for the government to fund it? (More evidence? If so, what type of evidence?)

**Finally, is there anything else you would like to share with us that we have not covered?**
