# Supplementary material for: Experiences and perceptions of participants, therapists and stakeholders about the intervention provided as part of the Early and Intensive Motor Training trial for People with SCI: A qualitative study
Source: Research Square preprint supplement (doi:10.21203/rs.3.rs-8255542/v1), 2025-12-05
Supplement: Supplementary file 2 [file 639e1a164ac68d2a46d739e9.docx]

**Supplementary File**: Additional exemplar quotes mapped to each of the 3 themes

| Themes | Exemplar quotes |
| --- | --- |
| **Theme 1**: The trial intervention was well received by participants and therapists | - *“The current exercise program [usual care] was too short…giving 5 hours physio per week and half of that one hour actually [it] was going to the wheelchair trial…or upper body exercises. So basically, my problem was on the lower body and on my legs, so I was getting only 2 hours [to] 2 and a half hours [of] exercises [on legs] per week. It is normal rehab to me, it was not enough…when I saw the program [trial intervention], I [was] really excited.” – participant 09* - *“Different physios...I can feel that each one has some [like] more understanding of, for example, legs and someone else has more understanding on arms. So from my point of view, I can understand more from their explanation of my recovery condition.” – participant 11* - *“Maybe 5 or 6 physios and you know 2 to 3 OTs. So it’s more of that breadth because everyone brings a different take at a different zone on things.” – therapist 17* - *“I enjoyed it...I wanted to be non-stop. I wanted to do as much as I could to try and get back as much as I thought was possible.” – participant 02* - *“....being able to grasp this opportunity [with extra training] sort of gave you a little, at least a little bit of a sense of regaining some form of control over my life” – participant 06* - *“During this program, believe me, I work[ed] very hard...it wasn’t easy at all. It’s not easy....I was on the bed when I went to my room. I was feeling very tired, but at the same time I was feeling very happy” – participant 9* - *“It is mentally, of course I became very positive as well because really when I achieve some good results, you know, I was feeling much happier.” – participant 09* - *“Definitely just wanted to thank everyone and super grateful when and I don’t think I would be where I am today without it. Yeah, I think I would definitely be a lot more in the wheelchair. I’ve got a huge sort of kick start on my rehab and therapy and super grateful for that opportunity” – participant 16* - *“I was lucky enough to be picked…my physio went from one hour a day to three hours a day and then that was every day and even on a Saturday...found it quite challenging and sometimes taxing but I enjoyed every minute of it and that extra time I put in and the extra effort I put in, certainly I think achieved a better result for me” – participant 14* - *“I was just so grateful to get into the programme and I know it helped me then that extra, that extra work just helped me tremendously and I’d be really disappointed if it was every stopped and so other people didn’t get the opportunity to improve like I did.” – participant 14* |
| Theme 2: There were strengths and challenges to providing the trial intervention according to its key principles | - *“I feel sometimes...weekly goals are hard, it’s almost if you don’t get it, it’s almost feels like a failure for your week...because sometimes it doesn’t go that fast”– therapist 02* - *“In patients that have the weak muscles, a lot of weak muscles, it’s difficult to find a functional goal for that patient, especially every week, it’s hard for me.” – therapist 05* - *“...We’d start our sessions by brining[ing] up the practice sheet and actually seeing, ok. That, those are the 4 goals. That’s what we’re working on, which ones have been achieved and which ones haven’t…shall we try them?...Depending on the patient…these are the goals so the patient knows and then we’ll kind of link in our practice sheet to see. Ok, actually they’ve done these exercise 3 times in a week….can we progress it or can we do a different exercise.” – therapist 14* - *“...We talk about [practice sheets]…what he wants to be working towards and then we negotiate what we should be doing.” – therapist 15* - *“...like yesterday you did it 3 lots of 10. Let’s do the same or can we do some more today?” – therapist 08* - *“ …in [those] participants…with weak muscles, it’s difficult for me to choose [exercises]. So in [those participants] that have a lot of weak muscles, I work with high repetitions on the same exercise...[but] sometimes if you do only, for example, 10 exercises for 2 hours every day, it is a little bit boring for the patient…Sometimes we do the electrical stimulation and that’s a bit boring for me.” – therapists 05* - *“...they felt it was going to be too much for them in terms of their fatigue management. So they were already finding it very tiring being at the gym and they didn’t think they could physically cope with the extra training if they were in that group.” – therapist 11* - *“...of a higher level of injury [their]capacity to be able to do the 12 extra hours a week might be a bit less than a younger, probably more incomplete type of injury.” – therapist 12* - *“...some people could handle it and then other people that are [with] complete [injury] wouldn’t get any outcomes below the level of injury…it was an elderly person that was incomplete and they were doing their regular training. They may struggle with extra workload.” – participant 16* - *“I was talking with the people that wanted to be on that, but they didn’t get to this group like me. So I know just from the opinions of these people that they were a little sad that they didn’t join this group because, you know, when somebody is deciding for something intensive, then you want to just reach that you want to get that. So yeah, in my opinion it would be a good idea to just give it that to every person that is joining.” – participant 01* |
| Theme 3: Participants, therapists and stakeholders differed in what they felt the trial needed to demonstrate to justify the future rollout of the trial intervention | - *“You know, the evidence is, you know if the evidence is there…it may have an impact on length of stay. You know, we may be able to get more people through. That’s the justification for other week[day] physio [services] weekend services.” – therapist 3* - *“…if we could show you that by doing extra therapy, you’re actually getting someone out of the hospital faster. They probably would look at that staffing stuff…The challenge is that they don’t focus on patient outcomes.” – therapist 17* - *“I just don’t think like evidence is not the thing that to convince the money holders…unless there’s a demonstratable benefit to the system…The main thing that they’re interested in is short length of stay, so more turnover...if you say [well] this intervention means that they have a better outcome when they leave hospital, that to our bureaucrats have no interest because it’s the same cost for them.” – stakeholder 04* - *“…getting the patients, the therapists on board, so showing them the evidence if the trial of course shows that it's better to do high intensity and yeah really get the buy in from them.” – stakeholder 01* - *“…I could have done different things. But let’s say my priority simple were rehab…trying to recover…I can do work. I mean, I can pick up my career later, but I can only recover now.” – participant 06* - *“Definitely the benefit of doing the intervention trial outweigh any hospital outings or [time with] visitors.” – participant 16* |
